# Supplementary material for: Not all silicon quantum dots are equal: photostability of silicon quantum dots with and without a thick amorphous shell
Source: Royal Society of Chemistry journal article supplement (doi:10.1039/d3nr04478e), 2023-12-07
Supplement: d3nr04478e1.pdf [file d3nr04478e1.pdf]

## Supporting Information

### **Not All Silicon Quantum Dots are Equal: Photostability of Silicon Quantum Dots with and without Thick Amorphous Shell**

I Teng Cheong, LiYifan Yang Szepesvari, Chuyi Ni, Cole Butler, Kevin M. O'Connor, Riley Hooper, Alkiviathes Meldrum, Jonathan G.C. Veinot\*

*\*jveinot@ualberta.ca*

## Table of Content

|                                                                                                                                                                     |    |
|---------------------------------------------------------------------------------------------------------------------------------------------------------------------|----|
| Figure S1. Dark-field TEM images and corresponding average-shifted histograms of N-SiQDs and O-SiQDs -----                                                          | 3  |
| Figure S2. Compositional analyses of the as-produced SiQDs. FT-IR spectra, TGA , survey and high-resolution Si 2p XP spectra of the as-produced nanoparticles ----- | 4  |
| Table S1. Summary of Optical Properties for the As-produced SiQDs -----                                                                                             | 5  |
| Figure S3. UV-vis absorption and PL spectra of N-SiQDs -----                                                                                                        | 6  |
| Figure S4. UV-vis absorption and PL spectra of O-SiQDs -----                                                                                                        | 7  |
| Table S2. Summary of Optical Properties for N-SiQDs Throughout Photo-degradation -----                                                                              | 8  |
| Table S3. Summary of Optical Properties for O-SiQDs Throughout Photo-degradation -----                                                                              | 9  |
| Figure S5. Linear fit of $k_r$ , $k_{nr}$ , and $k_r/k_{nr}$ of SiQDs (a-c for N-SiQDs and c-d for O-SiQDs) -----                                                   | 10 |
| Table S4. Summary of Linear Fit for SiQDs Recombination Rate -----                                                                                                  | 11 |
| Figure S6. High-resolution Si 2p XP spectra of N-SiQDs and O-SiQDs with and without 72 h of UV-irradiation -----                                                    | 12 |
| Figure S7. FT-IR of N-SiQDs and O-SiQDs with and without 72 h of UV-irradiation -----                                                                               | 12 |
| Figure S8. Dark-field TEM images and corresponding average-shifted histograms of N-SiQDs and O-SiQDs after 72 h of UV exposure -----                                | 13 |

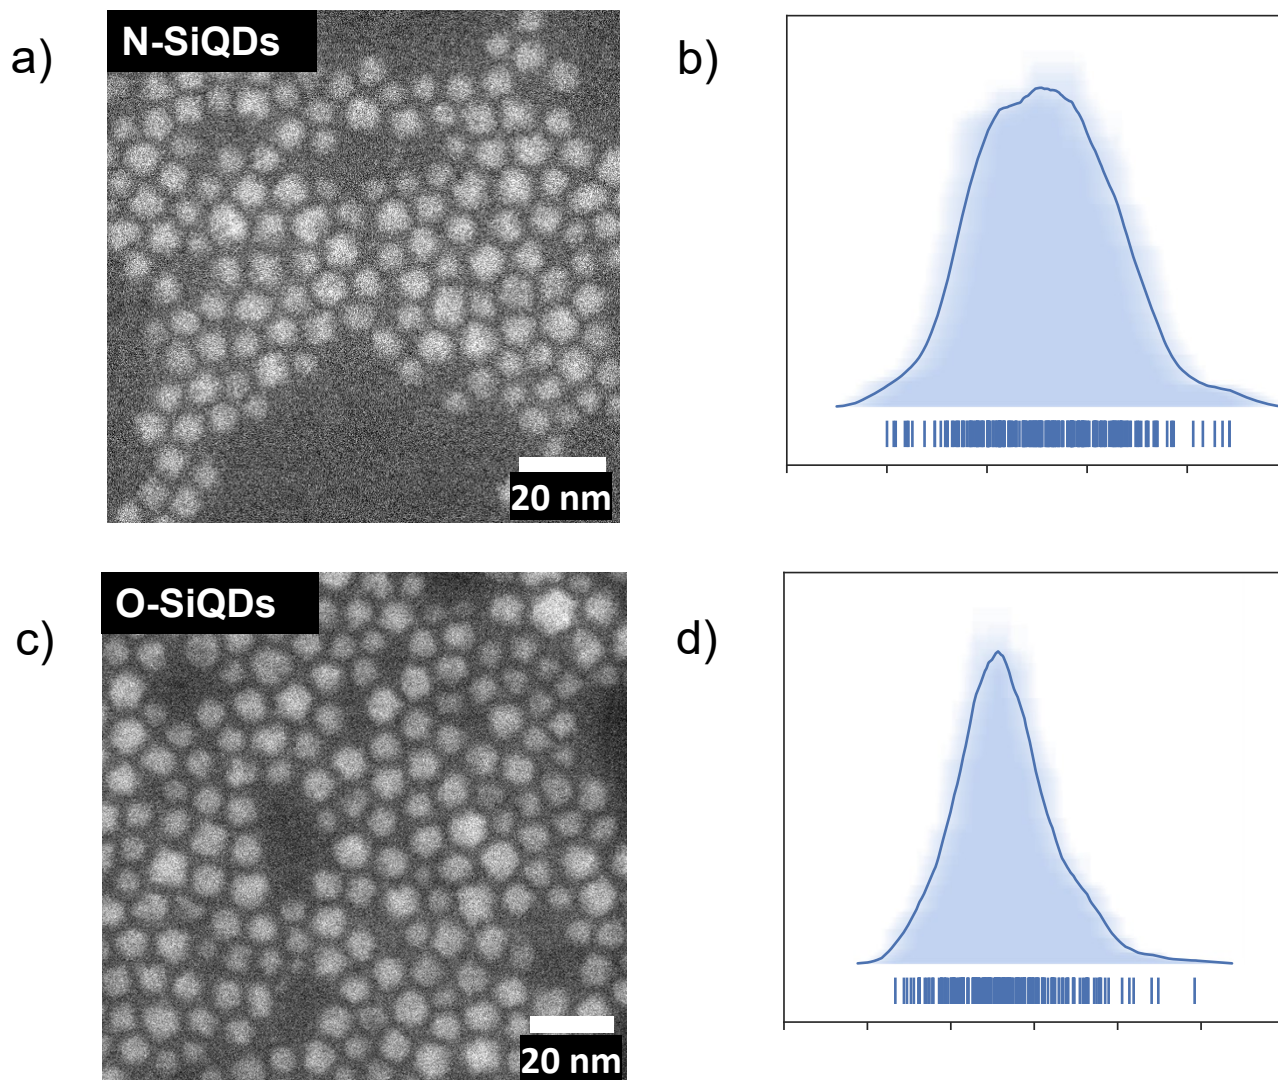

**Figure S1.** Dark-field TEM images of a) N-SiQDs and c) O-SiQDs. Average-shifted histogram showing the size distribution of as-produced b) N-SiQDs and d) O-SiQDs from corresponding TEM images.

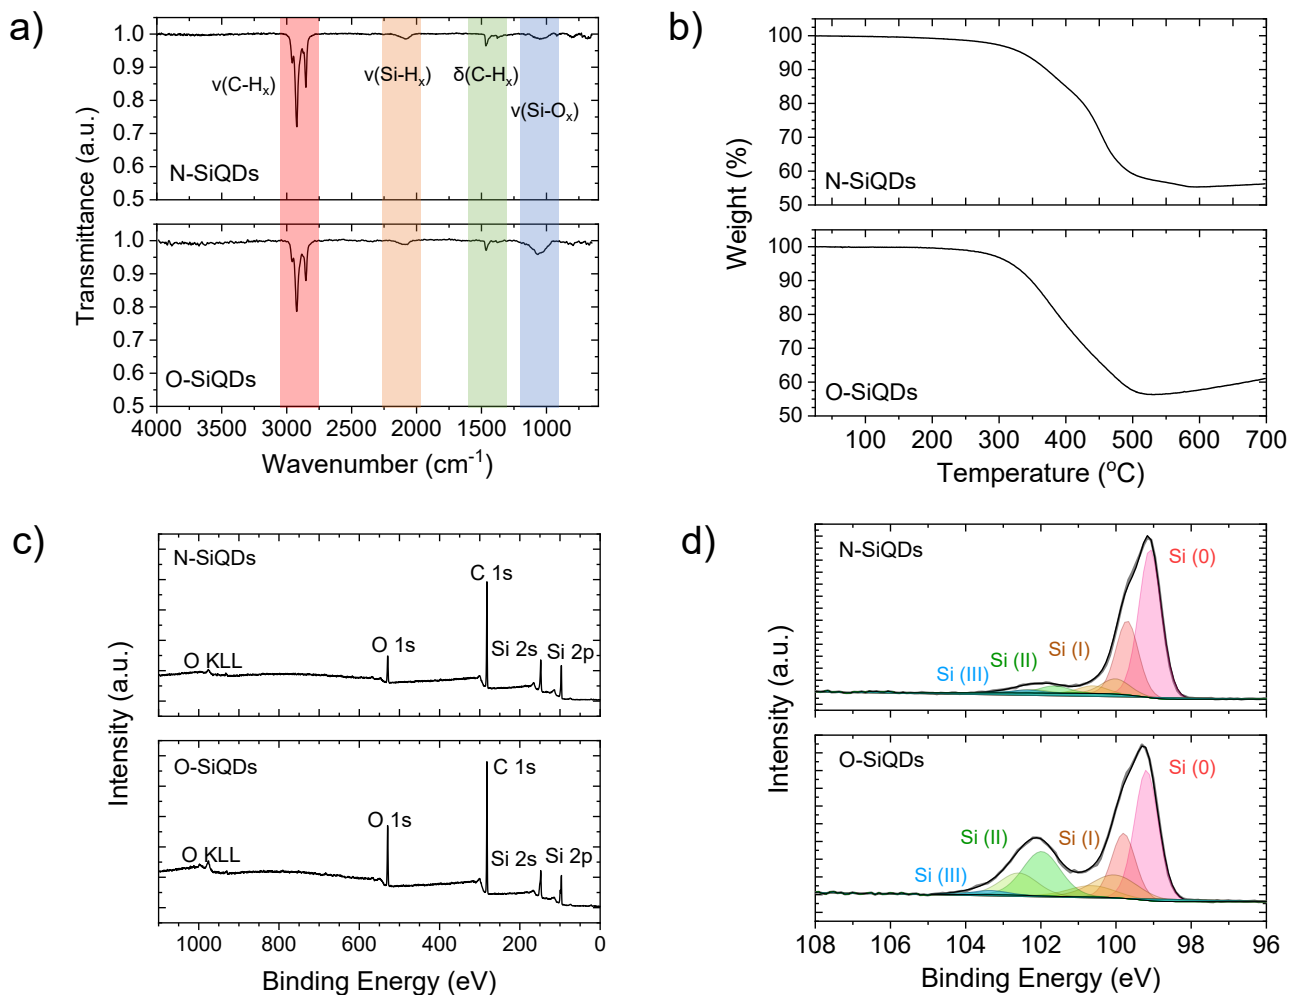

**Figure S2.** Compositional analyses of the as-produced SiQDs. a) FT-IR spectra and b) TGA of the SiQDs. c) Survey and d) high-resolution Si 2p XPS spectra of the as-produced nanoparticles.

**Table S1.** Summary of Optical Properties for the As-produced SiQDs

| Sample         | PL Max<br>[nm] | FWHM<br>[nm] | PLQY<br>[%] | $\tau$<br>[ $\mu$ s] | $\tau_r$<br>[ $\mu$ s] | $k_r$<br>[ $\mu$ s <sup>-1</sup> ] | $\tau_{nr}$<br>[ $\mu$ s] | $k_{nr}$<br>[ $\mu$ s <sup>-1</sup> ] | $k_r/k_{nr}$ |
|----------------|----------------|--------------|-------------|----------------------|------------------------|------------------------------------|---------------------------|---------------------------------------|--------------|
| N-1            | 888            | 163          | 41.0        | 251.6                | 614.5                  | 1.63E-03                           | 426.2                     | 2.35E-03                              | 0.693        |
| N-2            | 817            | 183          | 37.5        | 199.5                | 532.5                  | 1.88E-03                           | 319.1                     | 3.13E-03                              | 0.599        |
| N-3            | 921            | 137          | 25.6        | N/A                  | N/A                    | N/A                                | N/A                       | N/A                                   | N/A          |
| N-4            | 827            | 220          | 24.3        | 184.6                | 759.2                  | 1.32E-03                           | 243.9                     | 4.10E-03                              | 0.321        |
| <b>Average</b> | 864            | 176          | 32.1        | 211.9                | 635.4                  | 1.61E-03                           | 329.7                     | 3.19E-03                              | 0.538        |
| O-1            | 926            | 177          | 30.1        | 294.1                | 976.4                  | 1.02E-03                           | 420.9                     | 2.38E-03                              | 0.431        |
| O-2            | 809            | 175          | 38.2        | 160.8                | 420.8                  | 2.38E-03                           | 260.2                     | 3.84E-03                              | 0.618        |
| O-3            | 827            | 168          | 31.7        | 167.8                | 529.2                  | 1.89E-03                           | 245.8                     | 4.07E-03                              | 0.464        |
| O-4            | 841            | 234          | 31.3        | 170.4                | 544.4                  | 1.84E-03                           | 248.0                     | 4.03E-03                              | 0.455        |
| O-5            | 946            | 129          | 18.8        | 403.0                | 2144.4                 | 4.66E-04                           | 496.3                     | 2.01E-03                              | 0.231        |
| <b>Average</b> | 870            | 177          | 30.0        | 239.2                | 923.05                 | 1.52E-03                           | 334.2                     | 3.27E-03                              | 0.440        |

N = normally-etched SiQDs O = over-etched SiQDs

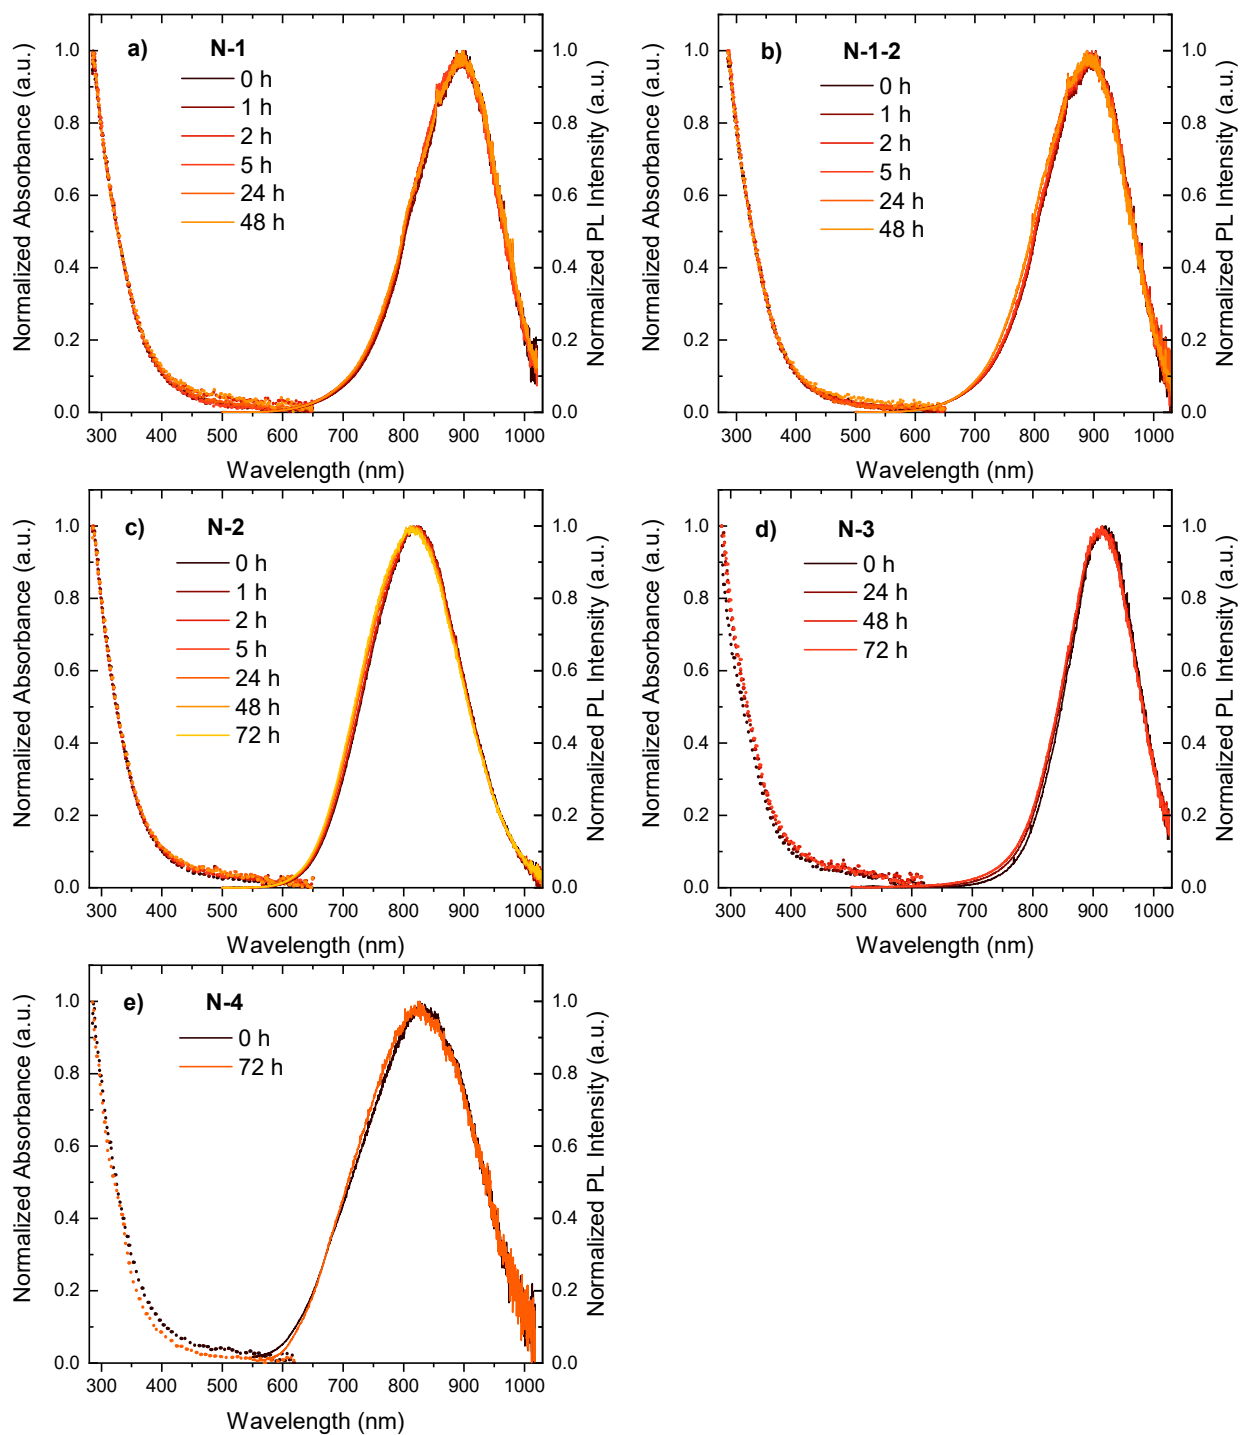

**Figure S3.** UV-vis absorption (dotted) and PL (solid) spectra of N-SiQDs. The numbering corresponds to Table S1.

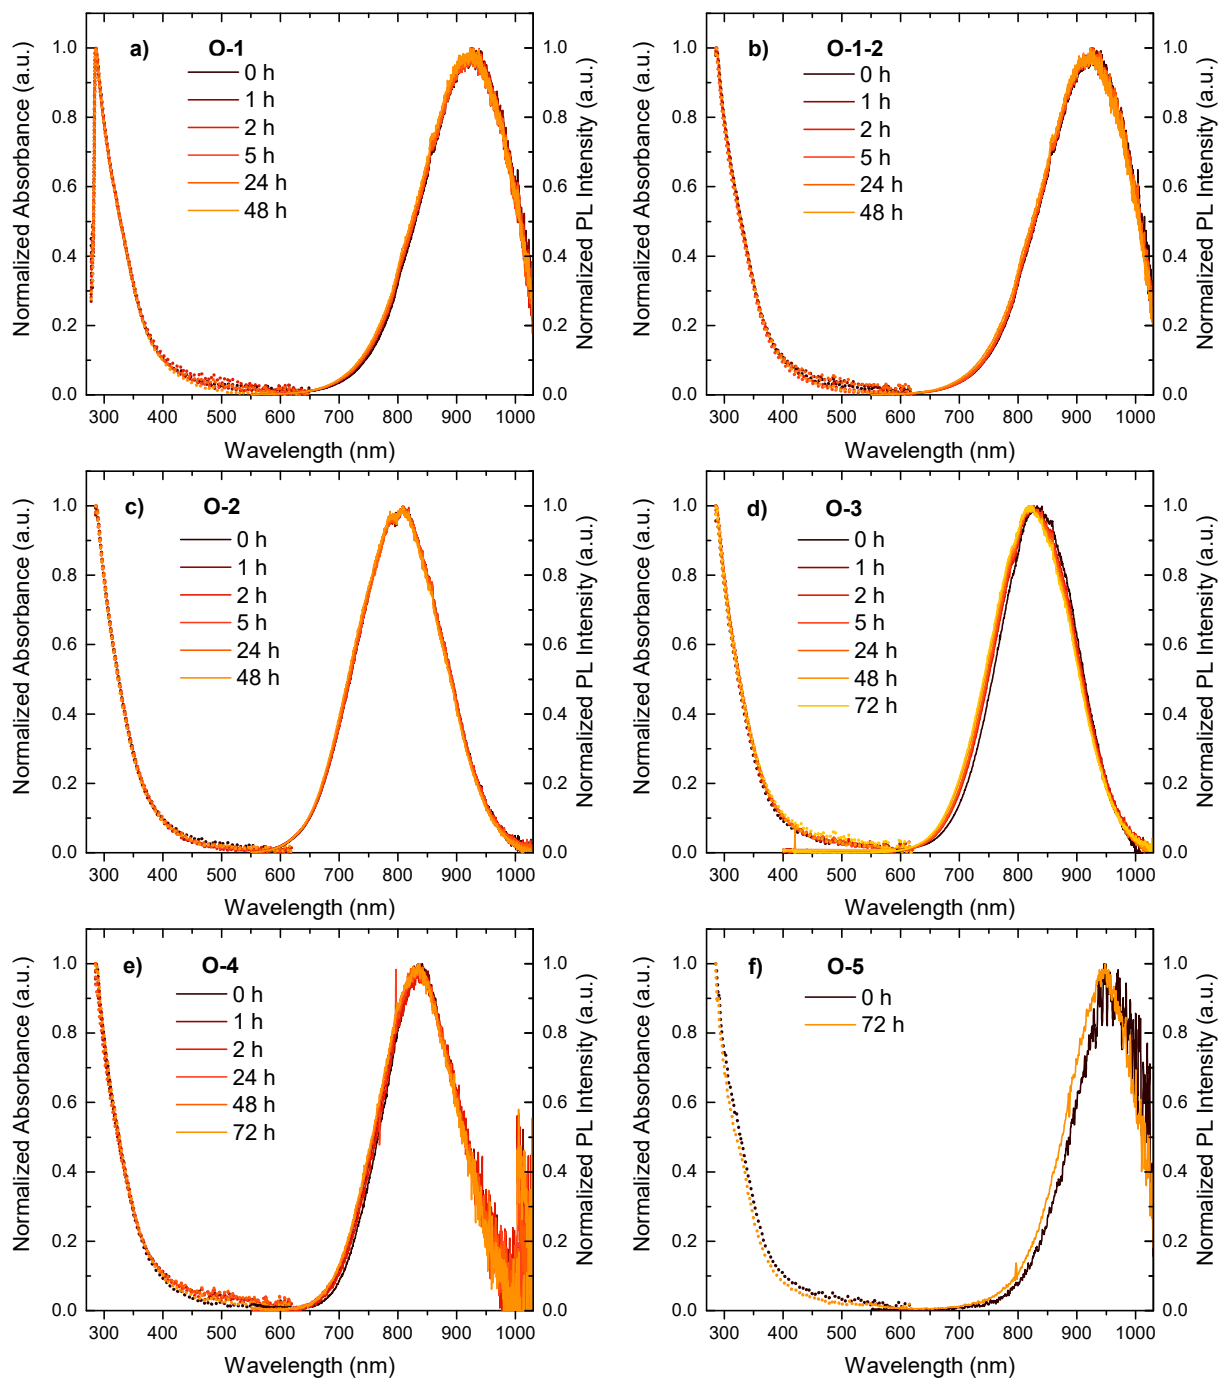

**Figure S4.** UV-vis absorption (dotted) and PL (solid) spectra of O-SiQDs. The numbering corresponds to Table S1.

**Table S2.** Summary of Optical Properties for N-SiQDs Throughout Photo-degradation

| Sample         | Degradation Time [h] | PL Maximum [nm] | FWHM [nm] | PLQY [%] | $\tau$ [ $\mu$ s] | $k_r$ [ $\mu$ s <sup>-1</sup> ] | $k_{nr}$ [ $\mu$ s <sup>-1</sup> ] | $k_r/k_{nr}$ | Relative Abs @ 365 nm |
|----------------|----------------------|-----------------|-----------|----------|-------------------|---------------------------------|------------------------------------|--------------|-----------------------|
| N-1            | 0                    | 888             | 163       | 41.0     | 251.6             | 0.0016                          | 0.0023                             | 0.69         | 0.22                  |
|                | 1                    | 902             | 164       | 41.1     | 251.1             | 0.0016                          | 0.0023                             | 0.70         | 0.22                  |
|                | 2                    | 899             | 166       | 39.9     | 250.6             | 0.0016                          | 0.0024                             | 0.64         | 0.23                  |
|                | 5                    | 897             | 165       | 37.6     | 254.7             | 0.0015                          | 0.0025                             | 0.60         | 0.22                  |
|                | 24                   | 897             | 167       | 36.2     | 251.1             | 0.0014                          | 0.0025                             | 0.57         | 0.23                  |
|                | 48                   | 897             | 169       | 28.8     | 248.4             | 0.0012                          | 0.0029                             | 0.40         | 0.24                  |
| N-1-2*         | 0                    | 888             | 163       | 41.0     | 251.6             | 0.0016                          | 0.0023                             | 0.69         | 0.22                  |
|                | 1                    | 902             | 163       | 41.1     | 256.2             | 0.0016                          | 0.0023                             | 0.65         | 0.21                  |
|                | 2                    | 888             | 163       | 39.9     | 251.6             | 0.0016                          | 0.0024                             | 0.78         | 0.23                  |
|                | 5                    | 896             | 165       | 37.6     | 252.7             | 0.0015                          | 0.0025                             | 0.68         | 0.22                  |
|                | 24                   | 888             | 169       | 36.2     | 253.2             | 0.0014                          | 0.0025                             | 0.55         | 0.22                  |
|                | 48                   | 888             | 170       | 27.8     | 250.1             | 0.0012                          | 0.0029                             | 0.38         | 0.23                  |
| N-3            | 0                    | 817             | 183       | 37.5     | 199.5             | 0.0019                          | 0.0031                             | 0.60         | 0.22                  |
|                | 1                    | 822             | 187       | 31.9     | 198.0             | 0.0016                          | 0.0034                             | 0.47         | 0.22                  |
|                | 2                    | 822             | 184       | 43.7     | 197.6             | 0.0016                          | 0.0035                             | 0.47         | 0.23                  |
|                | 5                    | 812             | 185       | 30.1     | 197.4             | 0.0015                          | 0.0036                             | 0.43         | 0.22                  |
|                | 24                   | 812             | 188       | 29.4     | 198.0             | 0.0015                          | 0.0036                             | 0.42         | 0.22                  |
|                | 48                   | 812             | 188       | 29.0     | 200.9             | 0.0014                          | 0.0035                             | 0.41         | 0.23                  |
|                | 72                   | 812             | 189       | 26.1     | 198.3             | 0.0013                          | 0.0037                             | 0.35         | 0.23                  |
| N-4            | 0                    | 921             | 137       | 25.6     | N/A               | N/A                             | N/A                                | N/A          | 0.20                  |
|                | 24                   | 915             | 138       | 23.0     | N/A               | N/A                             | N/A                                | N/A          | 0.22                  |
|                | 48                   | 914             | 141       | 23.5     | N/A               | N/A                             | N/A                                | N/A          | 0.22                  |
|                | 72                   | 915             | 140       | 21.0     | N/A               | N/A                             | N/A                                | N/A          | 0.24                  |
| N-5            | 0                    | 827             | 220       | 24.3     | 184.6             | 0.0013                          | 0.0041                             | 0.32         | 0.22                  |
|                | 72                   | 824             | 224       | 11.5     | 177.3             | 0.0006                          | 0.0050                             | 0.13         | 0.17                  |
| <b>Average</b> | 0                    | 869             | 173       | 33.9     | 221.9             | 0.0016                          | 0.0030                             | 0.58         | 0.22                  |
|                | 1                    | 875             | 171       | 38.0     | 235.1             | 0.0016                          | 0.0027                             | 0.61         | 0.22                  |
|                | 2                    | 870             | 171       | 41.2     | 233.3             | 0.0016                          | 0.0028                             | 0.63         | 0.23                  |
|                | 5                    | 868             | 172       | 35.1     | 234.9             | 0.0015                          | 0.0028                             | 0.57         | 0.22                  |
|                | 24                   | 878             | 165       | 31.2     | 234.1             | 0.0015                          | 0.0029                             | 0.51         | 0.22                  |
|                | 48                   | 877             | 167       | 27.3     | 233.2             | 0.0013                          | 0.0031                             | 0.40         | 0.23                  |
|                | 72                   | 850             | 185       | 19.5     | 187.8             | 0.0010                          | 0.0044                             | 0.24         | 0.21                  |

\*N-1-2 is a separate degradation trial using the same SiQDs as N-1.



**Table S3.** Summary of Optical Properties for O-SiQDs Throughout Photo-degradation

| Sample         | Degradation Time [h] | PL Maximum [nm] | FWHM [nm] | PLQY [%] | $\tau$ [ $\mu$ s] | $k_r$ [ $\mu$ s <sup>-1</sup> ] | $k_{nr}$ [ $\mu$ s <sup>-1</sup> ] | $k_r/k_{nr}$ | Relative Abs @ 365 nm |
|----------------|----------------------|-----------------|-----------|----------|-------------------|---------------------------------|------------------------------------|--------------|-----------------------|
| O-1            | 0                    | 926             | 177       | 30.1     | 294.1             | 0.0010                          | 0.0024                             | 0.43         | 0.22                  |
|                | 1                    | 926             | 182       | 27.7     | 299.8             | 0.0009                          | 0.0024                             | 0.43         | 0.22                  |
|                | 2                    | 926             | 177       | 26.1     | 297.7             | 0.0009                          | 0.0024                             | 0.41         | 0.23                  |
|                | 5                    | 928             | 179       | 26.1     | 304.0             | 0.0009                          | 0.0023                             | 0.38         | 0.22                  |
|                | 24                   | 923             | 181       | 26.9     | 304.0             | 0.0009                          | 0.0024                             | 0.35         | 0.22                  |
|                | 48                   | 923             | 184       | 27.9     | 303.7             | 0.0010                          | 0.0022                             | 0.35         | 0.22                  |
| O-1-2*         | 0                    | 926             | 177       | 30.1     | 294.1             | 0.0010                          | 0.0024                             | 0.43         | 0.22                  |
|                | 1                    | 926             | 178       | 28.0     | 298.6             | 0.0010                          | 0.0023                             | 0.37         | 0.23                  |
|                | 2                    | 928             | 178       | 26.8     | 302.8             | 0.0010                          | 0.0024                             | 0.39         | 0.22                  |
|                | 5                    | 923             | 178       | 27.9     | 307.1             | 0.0009                          | 0.0024                             | 0.39         | 0.21                  |
|                | 24                   | 923             | 180       | 27.9     | 303.1             | 0.0009                          | 0.0024                             | 0.37         | 0.22                  |
|                | 48                   | 923             | 180       | 30.7     | 308.6             | 0.0009                          | 0.0024                             | 0.45         | 0.22                  |
| O-3            | 0                    | 809             | 175       | 38.2     | 160.8             | 0.0023                          | 0.0039                             | 0.60         | 0.21                  |
|                | 1                    | 809             | 176       | 39.8     | 159.0             | 0.0023                          | 0.0040                             | 0.59         | 0.20                  |
|                | 2                    | 809             | 178       | 41.8     | 159.7             | 0.0023                          | 0.0039                             | 0.60         | 0.20                  |
|                | 5                    | 809             | 175       | 41.3     | 157.8             | 0.0023                          | 0.0041                             | 0.56         | 0.21                  |
|                | 24                   | 809             | 175       | 38.3     | 158.4             | 0.0023                          | 0.0040                             | 0.58         | 0.21                  |
|                | 48                   | 809             | 178       | 36.1     | 154.2             | 0.0022                          | 0.0043                             | 0.52         | 0.20                  |
| O-4            | 0                    | 827             | 168       | 31.7     | 167.8             | 0.0013                          | 0.0060                             | 0.32         | 0.19                  |
|                | 1                    | 824             | 162       | 30.3     | 164.2             | 0.0013                          | 0.0061                             | 0.30         | 0.22                  |
|                | 2                    | 824             | 162       | 30.2     | 163.5             | 0.0013                          | 0.0061                             | 0.30         | 0.20                  |
|                | 5                    | 827             | 162       | 30.8     | 164.2             | 0.0013                          | 0.0061                             | 0.31         | 0.22                  |
|                | 24                   | 824             | 164       | 30.5     | 163.5             | 0.0013                          | 0.0061                             | 0.30         | 0.22                  |
|                | 48                   | 819             | 165       | 29.8     | 161.3             | 0.0013                          | 0.0062                             | 0.30         | 0.21                  |
|                | 72                   | 819             | 164       | 27.5     | 161.3             | 0.0011                          | 0.0062                             | 0.27         | 0.23                  |
| O-5            | 0                    | 841             | 234       | 31.3     | 170.4             | 0.0018                          | 0.0040                             | 0.46         | 0.20                  |
|                | 1                    | 837             | 169       | 30.3     | 175.2             | 0.0017                          | 0.0040                             | 0.44         | 0.22                  |
|                | 2                    | 837             | 209       | 27.8     | 167.6             | 0.0017                          | 0.0043                             | 0.39         | 0.20                  |
|                | 24                   | 837             | 209       | 33.7     | 178.9             | 0.0019                          | 0.0037                             | 0.51         | 0.22                  |
|                | 48                   | 834             | 195       | 37.6     | 192.1             | 0.0020                          | 0.0033                             | 0.60         | 0.22                  |
|                | 72                   | 837             | 236       | 32.4     | 186.4             | 0.0017                          | 0.0036                             | 0.48         | 0.21                  |
| O-6            | 0                    | 946             | 129       | 18.8     | 403.0             | 0.0005                          | 0.0020                             | 0.23         | 0.22                  |
|                | 72                   | 948             | 135       | 7.5      | 402.2             | 0.0002                          | 0.0023                             | 0.08         | 0.18                  |
| <b>Average</b> | 0                    | 870             | 177       | 30.0     | 239.2             | 0.0014                          | 0.0037                             | 0.41         | 0.21                  |
|                | 1                    | 864             | 173       | 31.2     | 219.4             | 0.0014                          | 0.0038                             | 0.42         | 0.22                  |
|                | 2                    | 865             | 181       | 30.6     | 218.2             | 0.0014                          | 0.0038                             | 0.42         | 0.21                  |
|                | 5                    | 872             | 173       | 31.5     | 233.2             | 0.0013                          | 0.0037                             | 0.41         | 0.21                  |
|                | 24                   | 863             | 182       | 31.5     | 221.6             | 0.0014                          | 0.0037                             | 0.42         | 0.22                  |
|                | 48                   | 862             | 180       | 32.4     | 224.0             | 0.0015                          | 0.0037                             | 0.45         | 0.21                  |
|                | 72                   | 868             | 179       | 22.5     | 250.0             | 0.0010                          | 0.0040                             | 0.28         | 0.21                  |

\*O-1-2 is a separate degradation trial using the same SiQDs as O-1.

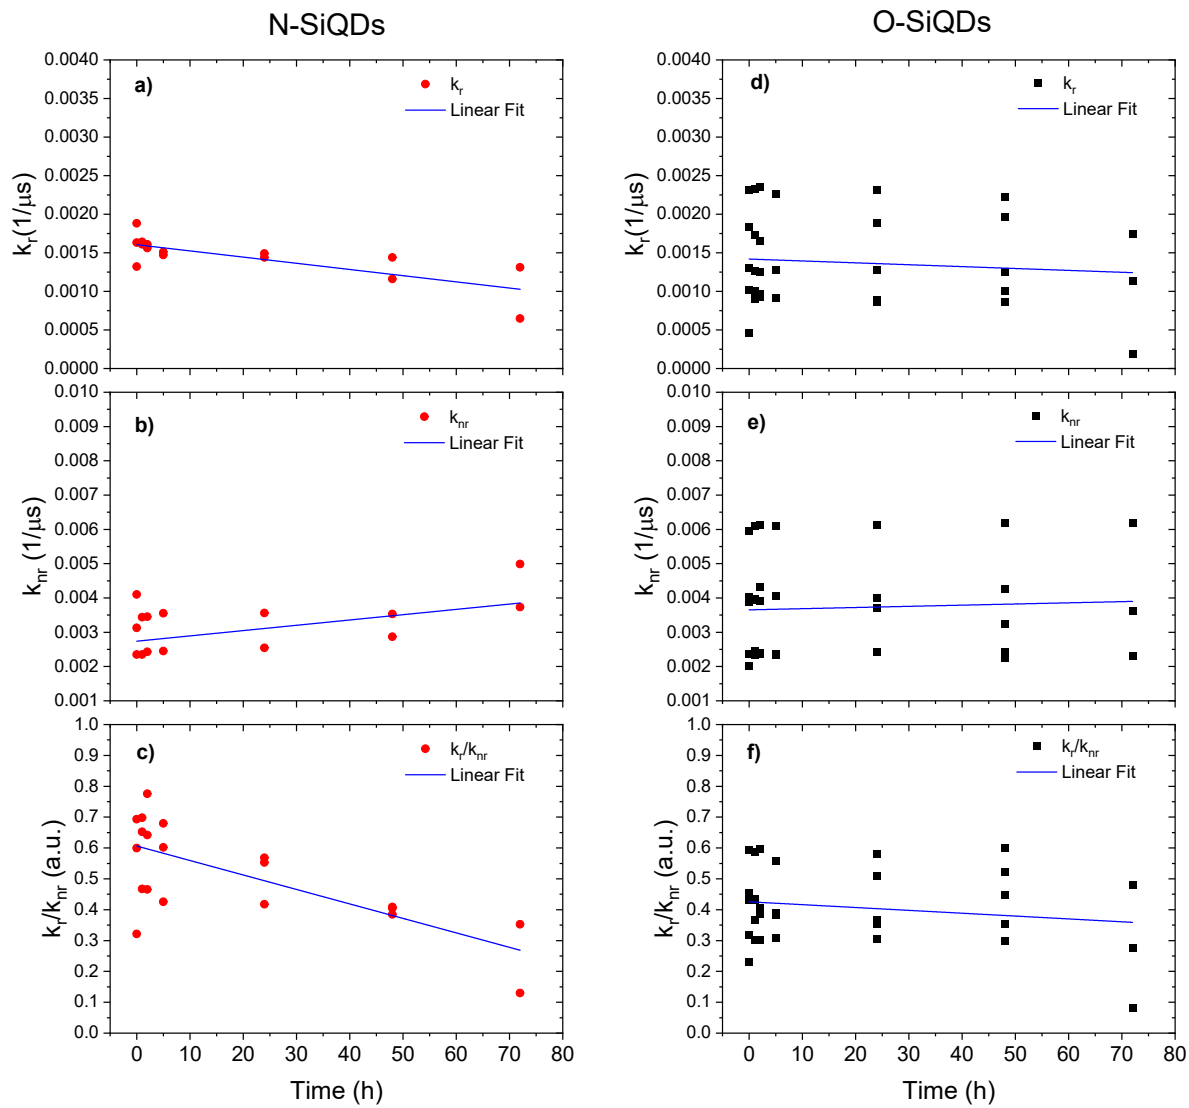

**Figure S5.** Linear fit of  $k_r$ ,  $k_{nr}$ , and  $k_r/k_{nr}$  of SiQDs (a-c for N-SiQDs and c-d for O-SiQDs).

**Table S4.** Summary of Linear Fit for SiQDs Recombination Rate

| Sample  |              |           | Value       | Standard Error | t-value  | P-value     |
|---------|--------------|-----------|-------------|----------------|----------|-------------|
| N-SiQDs | $k_r$        | Intercept | 0.0016      | 4.32375E-5     | 37.11502 | 0           |
|         |              | Slope     | -8.02471E-6 | 1.43376E-6     | -5.59697 | 2.13358E-5  |
|         | $k_{nr}$     | Intercept | 0.00274     | 1.72603E-4     | 15.86944 | 2.03459E-12 |
|         |              | Slope     | 1.54649E-5  | 5.72354E-6     | 2.70198  | 0.01413     |
|         | $k_r/k_{nr}$ | Intercept | 0.60632     | 0.03175        | 19.09527 | 7.37188E-14 |
|         |              | Slope     | -0.00469    | 0.00105        | -4.45414 | 2.72092E-4  |
| O-SiQDs | $k_r$        | Intercept | 0.00142     | 1.308E-4       | 10.84687 | 4.44089E-12 |
|         |              | Slope     | -2.4474E-6  | 4.33258E-6     | -0.56488 | 0.57622     |
|         | $k_{nr}$     | Intercept | 0.00365     | 3.25774E-4     | 11.21471 | 1.93623E-12 |
|         |              | Slope     | 3.41376E-6  | 1.07909E-5     | 0.31636  | 0.75385     |
|         | $k_r/k_{nr}$ | Intercept | 0.4256      | 0.02634        | 16.16049 | 2.22045E-16 |
|         |              | Slope     | -9.2474E-4  | 8.72351E-4     | -1.06005 | 0.29731     |

The t-value is a measure of how many standard errors the estimated value is away from zero (i.e, slope = zero). A higher absolute t-value suggests that the estimate is more likely to be reliable. The P-value indicates the likelihood of the null hypothesis (i.e., there is no relationship between the independent variable and the dependent variable). A low p-value (typically < 0.05) suggests that one can reject the null hypothesis.

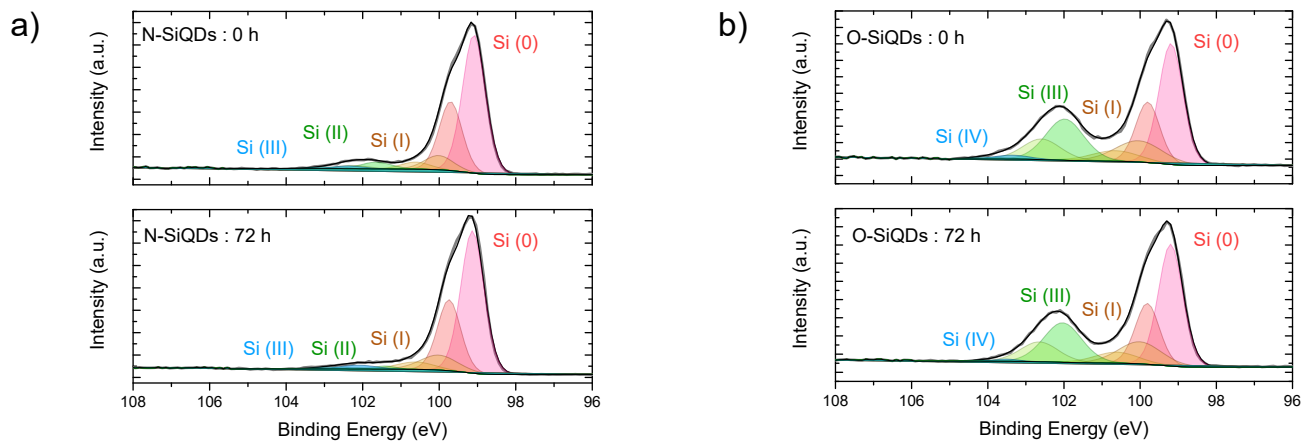

**Figure S6.** High-resolution Si 2p XP spectra of a) N-SiQDs and b) O-SiQDs with (top) and without (bottom) 72 h of UV irradiation.

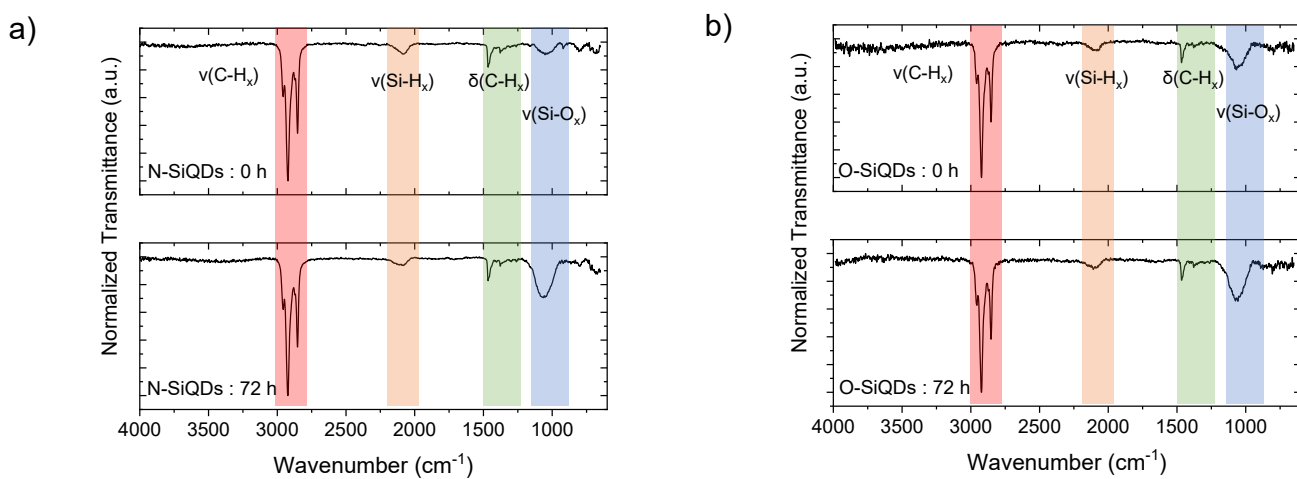

**Figure S7.** FT-IR of a) N-SiQDs and b) O-SiQDs with (top) and without (bottom) 72 h of UV irradiation.

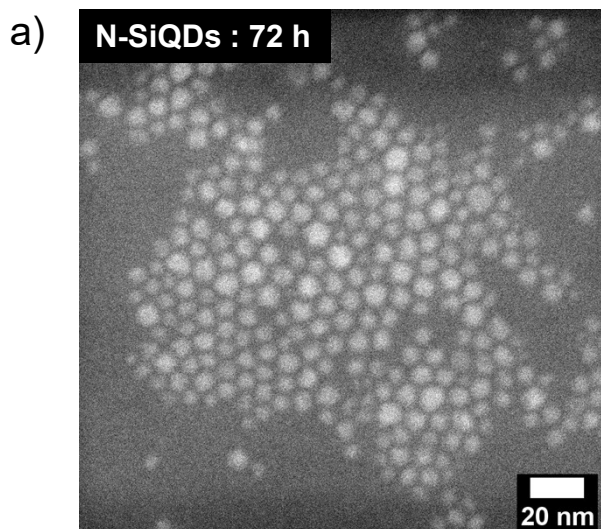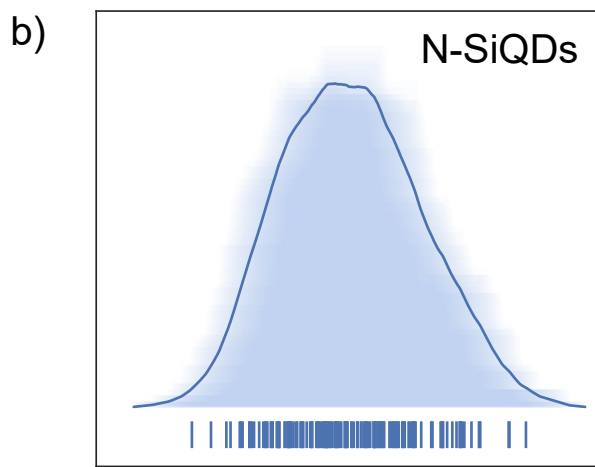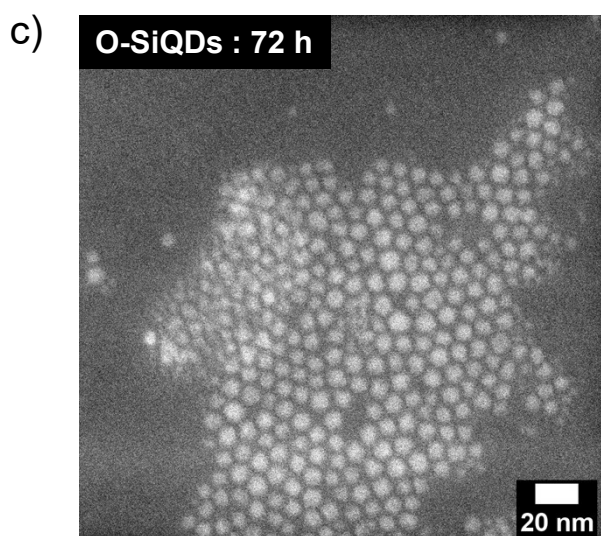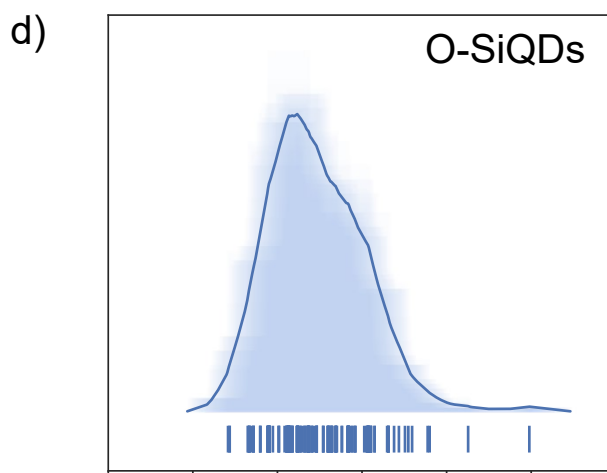

**Figure S8.** Dark-field TEM images of a) N-SiQDs and c) O-SiQDs) after 72 h of UV exposure. Average-shifted histogram showing the size distribution of the degraded b) N-SiQDs and d) O-SiQDs from corresponding TEM images.
